# Supplementary figures and images for: Chlorogenic acid enhances the effects of 5-fluorouracil in human hepatocellular carcinoma cells through the inhibition of extracellular signal-regulated kinases
Source: PubMed Central journal article supplement — Anticancer Drugs. 2015 Apr 2;26(5):540–6. doi: 10.1097/CAD.0000000000000218 (PMC4415958; doi:10.1097/cad.0000000000000218), 2015-04-02

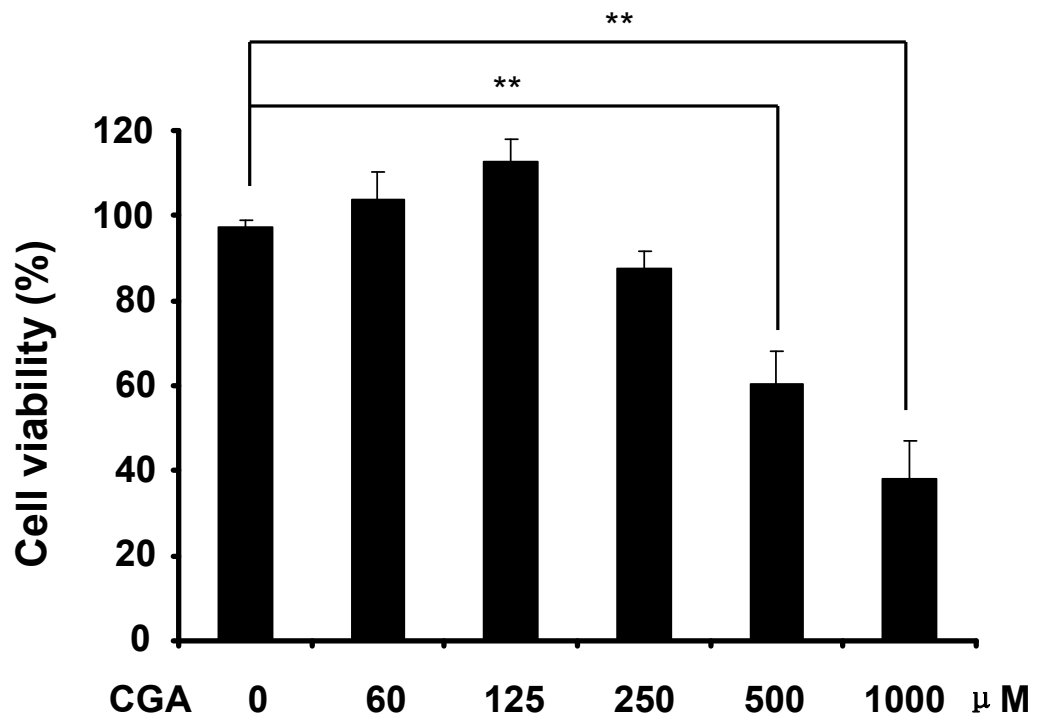

Supplement: cad-26-540-s001.pdf [file cad-26-540-s001.pdf]

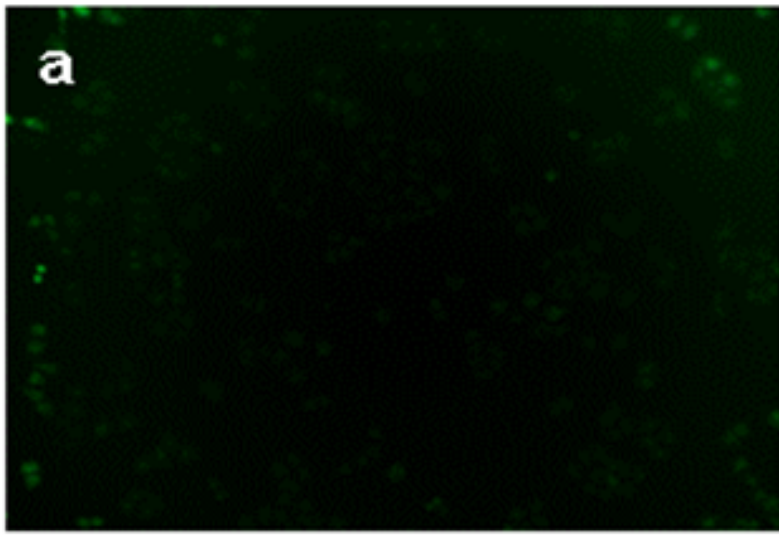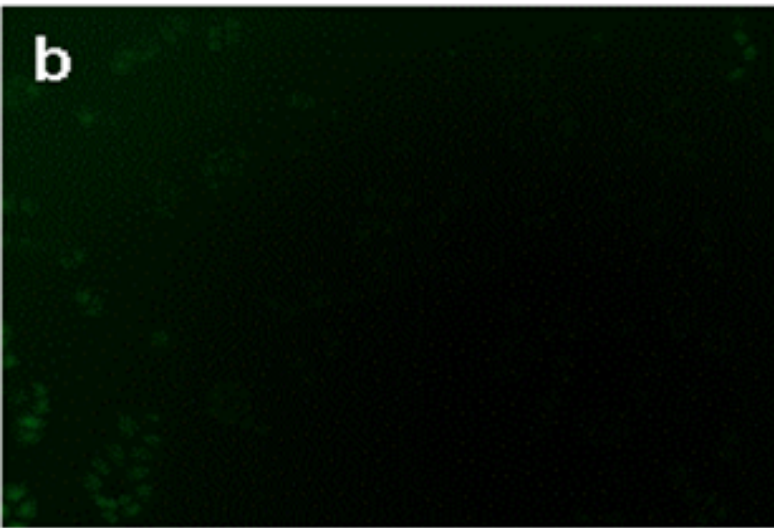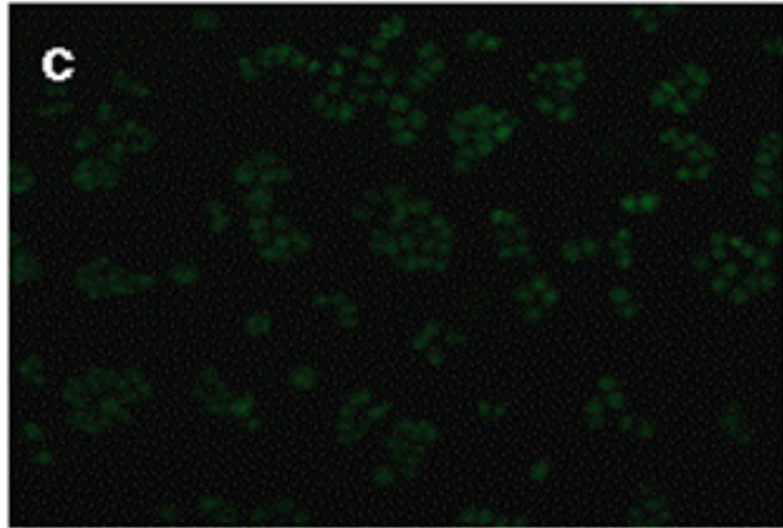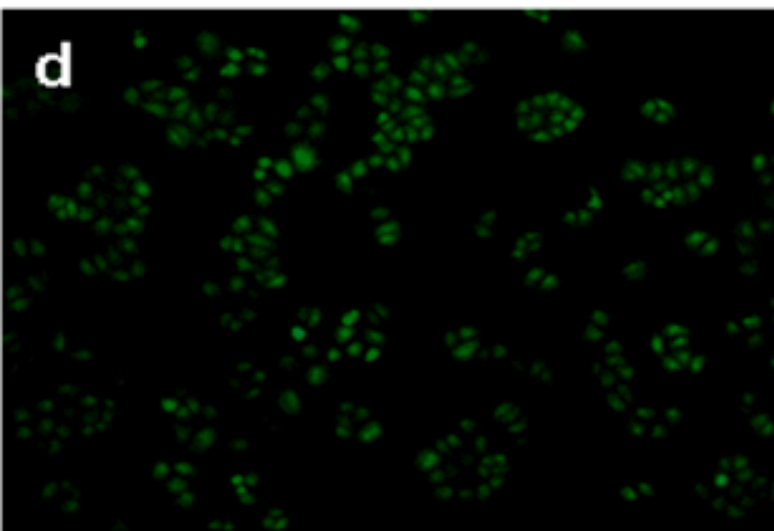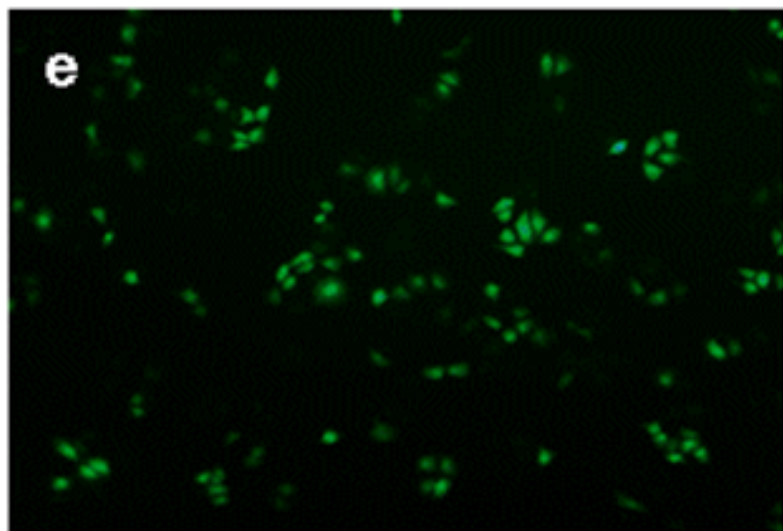

Supplement: cad-26-540-s002.pdf [file cad-26-540-s002.pdf]

**A**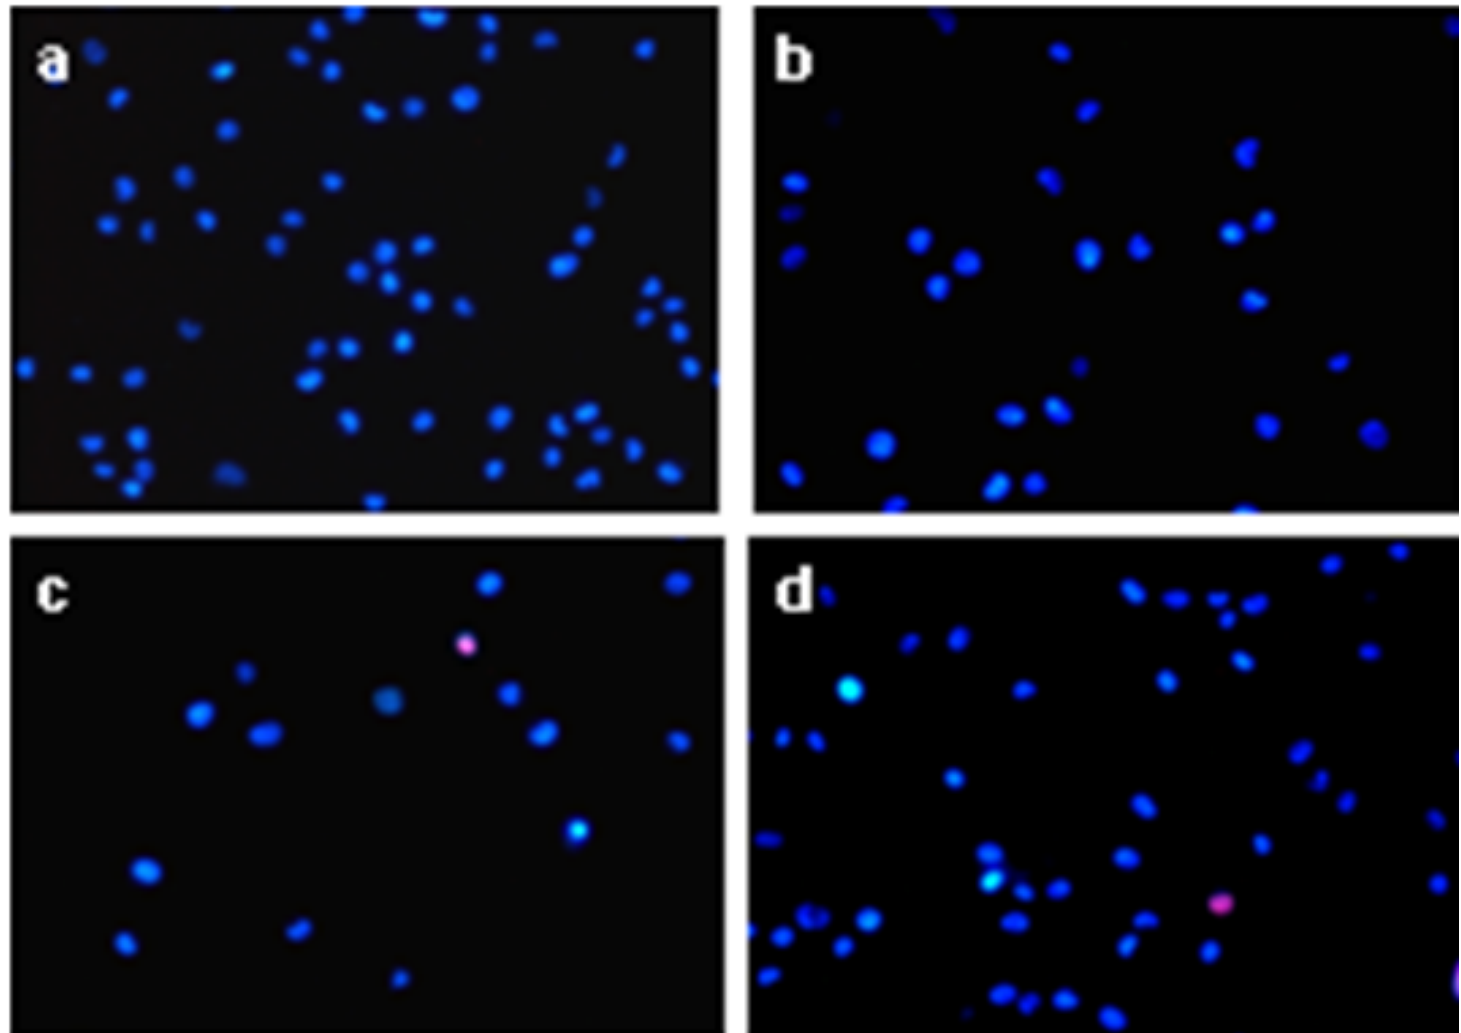**B**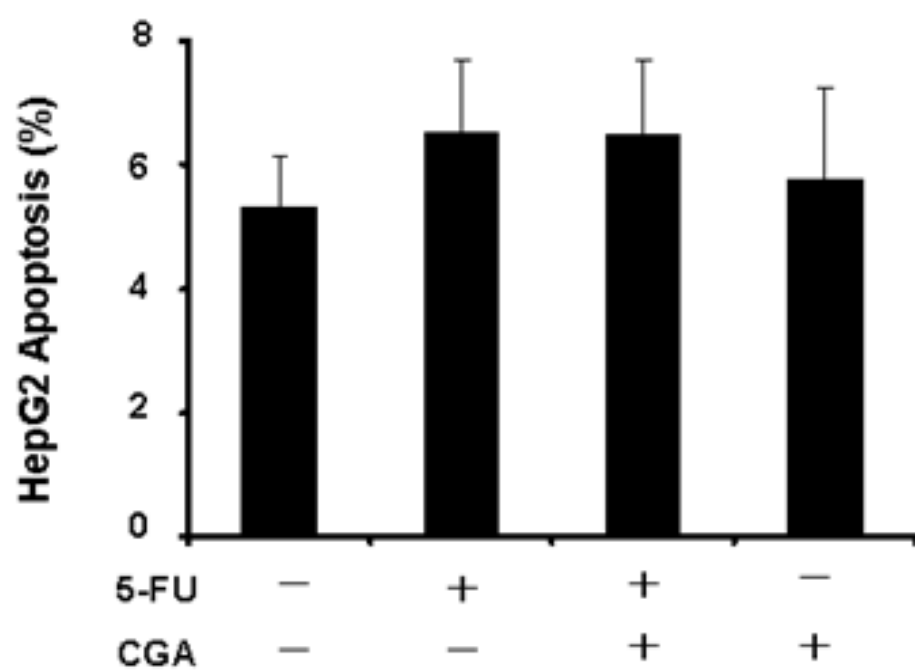

Supplement: cad-26-540-s003.pdf [file cad-26-540-s003.pdf]
